# Supplementary material for: Synthesis of a fully biobased cellulose-3-(2-hydroxyphenyl) propionate ester with antioxidant activity and UV-resistant properties by the DBU/CO2/DMSO solvent system
Source: Royal Society of Chemistry journal article supplement (doi:10.1039/d0gc03478a), 2021-01-01
Supplement: d0gc03478a1.pdf [file d0gc03478a1.pdf]

## Supporting information

### **Synthesis of fully biobased cellulose-3-(2-hydroxyphenyl) propionate ester with antioxidant activity and UV-resistant properties by the DBU/CO<sub>2</sub>/DMSO solvent system**

Yuanlong Guo,<sup>a</sup> Long Li,<sup>a</sup> Gu Guo,<sup>a</sup> Ming Pei,<sup>a</sup> Lihua Zhang,<sup>a</sup> Haibo Xie,<sup>a,b\*</sup> Hui Sun,  
<sup>c</sup> Qiang Zheng,<sup>a,d\*</sup>

<sup>a</sup>Department of Polymer Materials and Engineering, College of Materials and  
Metallurgy, Guizhou University, Guiyang, 550025, China; Email: hbxie@gzu.edu.cn

<sup>b</sup>Sichuan University, State Key Laboratory of Polymer Materials Engineering,  
Chengdu, 610065, Sichuan, PR China

<sup>c</sup>Beijing Technology and Business University, School of Materials and Mechanical  
Engineering

<sup>d</sup>College of Materials, Taiyuan University of Technology, Taiyuan, 030000, China;  
Email: zhengqiang@zju.edu.cn

**Table S1 Comparison of antioxidant activity of bio-based materials**

| code           | Raw materials, system                                                  | Reaction conditions         | DPPH Radical scavenging                                                                                  |
|----------------|------------------------------------------------------------------------|-----------------------------|----------------------------------------------------------------------------------------------------------|
| 1 <sup>1</sup> | Cellulose with 3,5-di-tert-butyl-4-hydroxybenzoic acid in ionic liquid | 50-80°C, 0.5-5h to reaction | The products with DS of 0.83 and a concentration of 60mM took 30min to reach a radical scavenging of 90% |

|                |                                                                                                        |                                                                             |                                                                                                                               |
|----------------|--------------------------------------------------------------------------------------------------------|-----------------------------------------------------------------------------|-------------------------------------------------------------------------------------------------------------------------------|
| 2 <sup>2</sup> | Chitosan with anthocyanin films with casting method                                                    | 30 °C with 50% relative humidity for 2 days to get anthocyanin <i>films</i> | The films with concentration of 5mg/ml took 60min to reach a radical scavenging of about 70-80%.                              |
| 3 <sup>3</sup> | Chitosan with Essential oil extraction from <i>E. globulus</i> films with casting method               | at room temperature during four days                                        | The films with concentration of 40mg/g reach a max radical scavenging of 43.62%.                                              |
| 4 <sup>4</sup> | Cellulose acetate with thymol films                                                                    | at room temperature with vacuum drying for 45min                            | The films with 20ug/ml concentration of Thymol reach a max radical scavenging of 65.16%.                                      |
| 5 <sup>5</sup> | a-D(+)-fructose in HCl solution                                                                        | The solutions were incubated at 75, 85, or 95°C                             | The systems to reach 90% free radical scavenging activity ranged from about 48 to 536 h. The activation energy was 77 kJ/mol. |
| 6 <sup>6</sup> | Chitosan grafted lignin monomers by ester activation through a carbodiimide-mediated coupling reaction | At 60°C for 12h                                                             | The sinapic acid grafted films with 1cm <sup>2</sup> /ml reach a max radical scavenging of 90% at 9h.                         |

## The principle of radical scavenging of CHP

The radical scavenging assay is based on the following principle<sup>7</sup>:

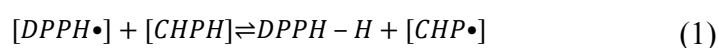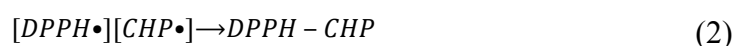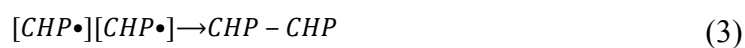

[DPPH•] on accepting a hydrogen (H) atom from CHP resulting into reduction of DPPH<sub>2</sub>, the purple colour changed to yellow with concomitant decrease in absorbance at 517 nm. The secondary reactions may be of limited occurrence. According to Eq. (2) and (3), the less reactive [CHP•] could reaction with another [DPPH•] as well as [CHP•].

Table S2 The kinetic parameters for CHP-2 to DPPH

| Concentration<br>of<br>2(mM) | Reaction<br>CHP-<br>temperature | Pseudo-first order reaction<br>kinetic equation |                | Pseudo-second order kinetics<br>equation          |                |
|------------------------------|---------------------------------|-------------------------------------------------|----------------|---------------------------------------------------|----------------|
|                              | T (°C)                          | $k_1$ (min <sup>-1</sup> )                      | R <sup>2</sup> | $k_2$ ((mMol/L) <sup>-1</sup> min <sup>-1</sup> ) | R <sup>2</sup> |
| 1                            | 25                              | 0.00702                                         | 0.98441        | 0.11091                                           | 0.98502        |
| 5                            | 25                              | 0.01129                                         | 0.98685        | 0.21417                                           | 0.93977        |
| 10                           | 25                              | 0.01663                                         | 0.98862        | 0.43161                                           | 0.94712        |
| 20                           | 25                              | 0.01881                                         | 0.99056        | 0.59584                                           | 0.95201        |
| 40                           | 25                              | 0.09424                                         | 0.821          | 14.01969                                          | 0.51497        |
| 5                            | 35                              | 0.01212                                         | 0.96451        | 0.31091                                           | 0.85457        |
| 5                            | 45                              | 0.02021                                         | 0.96174        | 0.66794                                           | 0.8285         |
| 5                            | 55                              | 0.02577                                         | 0.98732        | 0.92160                                           | 0.92722        |

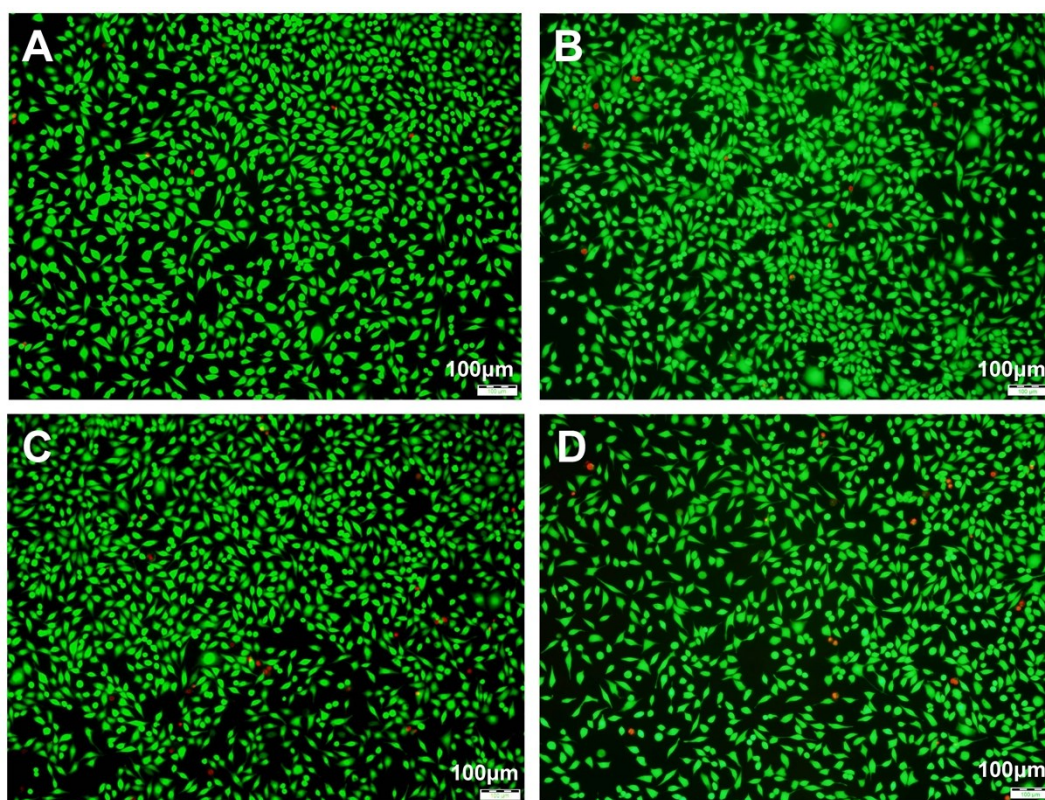

**Fig. S1** Fluorescent images of L929 cells stained by Calcein-AM (green) and PI (red) treated with 10 µM CHP-7 (A); treated with 30 µM CHP-7 (B); treated with 60 µM CHP-7 (C); treated with 100 µM CHP-7 (D).

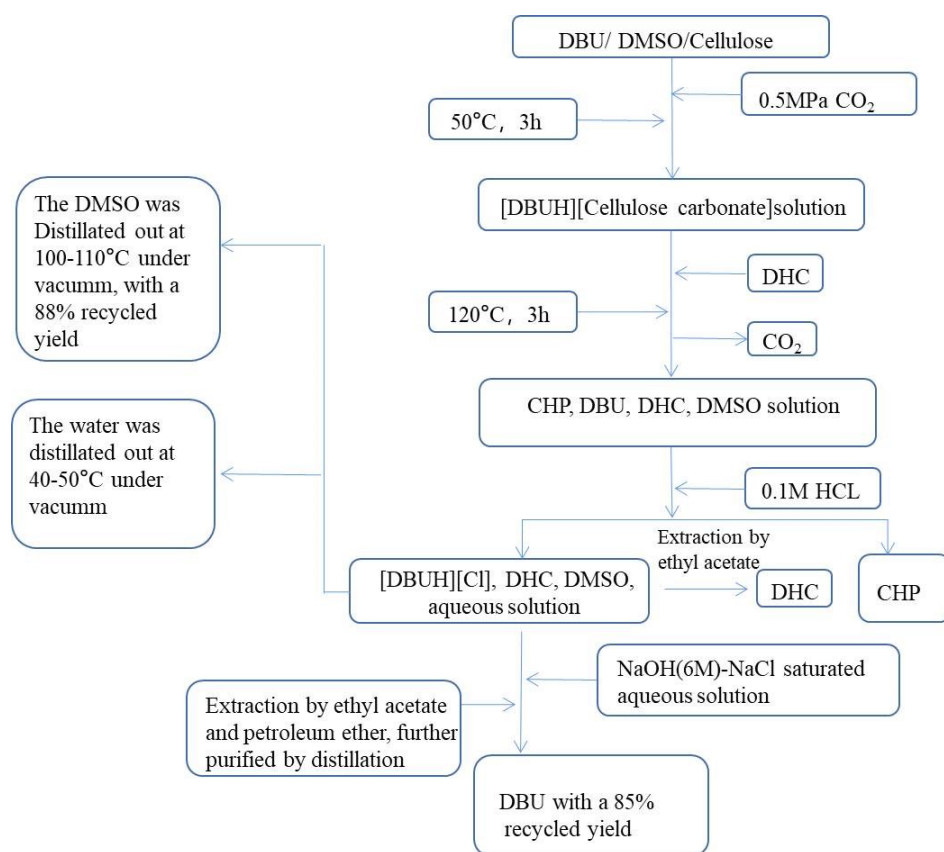

Fig. S2 A flowchart for the primary recycling of DBU and DMSO

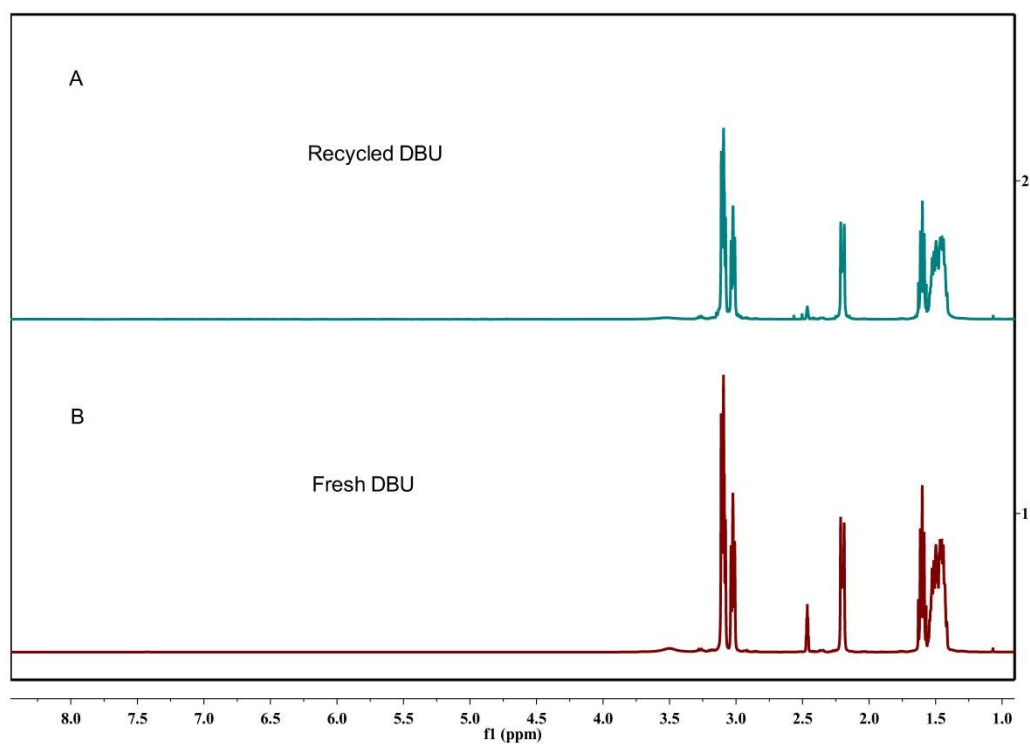

Fig.S3 Comparative  $^1\text{H}$  NMR spectra of fresh DBU and recycled DBU.

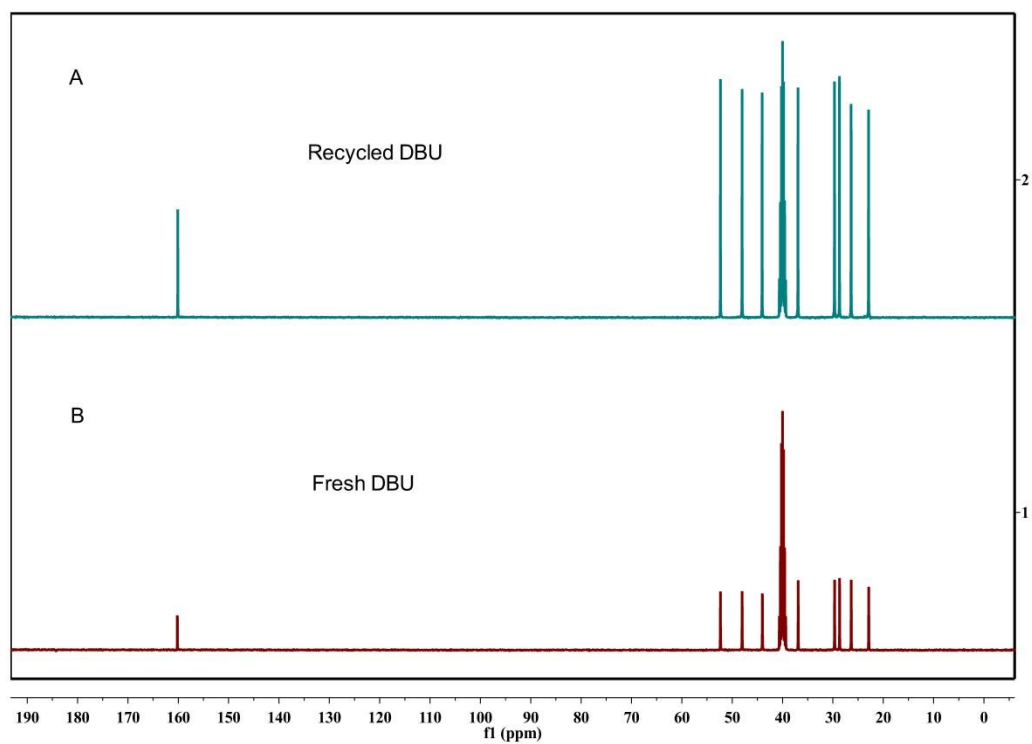

Fig.S4 Comparative  $^{13}\text{C}$  NMR spectra of fresh DBU and recycled DBU.

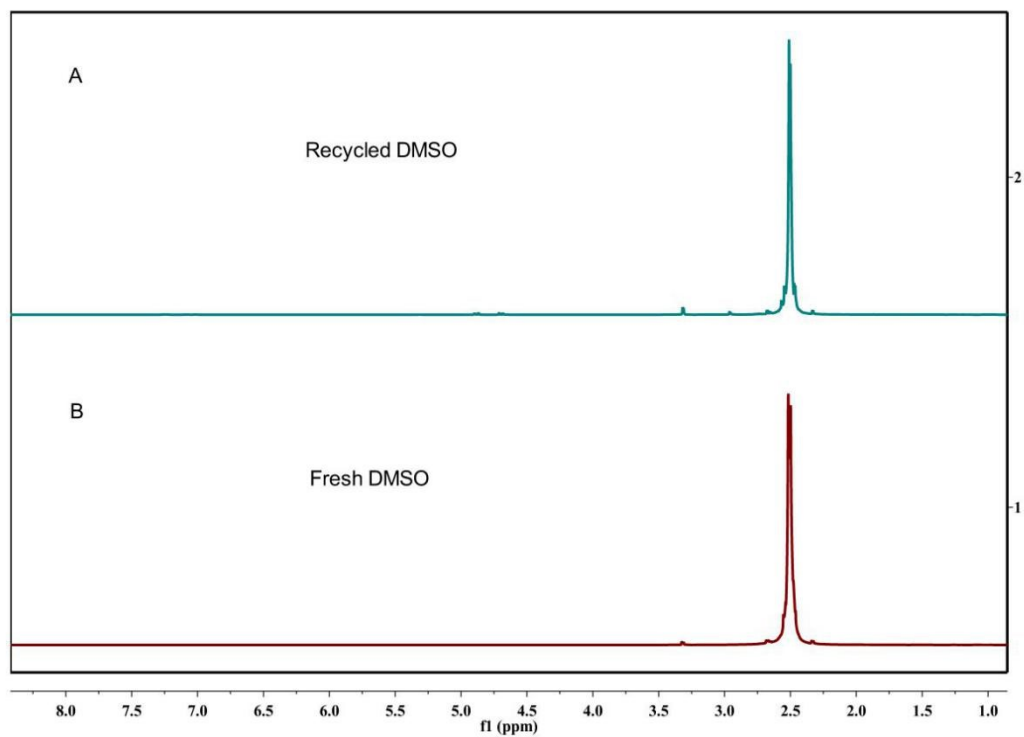

Fig. S5 Comparative  $^1\text{H}$  NMR spectra of fresh DMSO and recycled DMSO

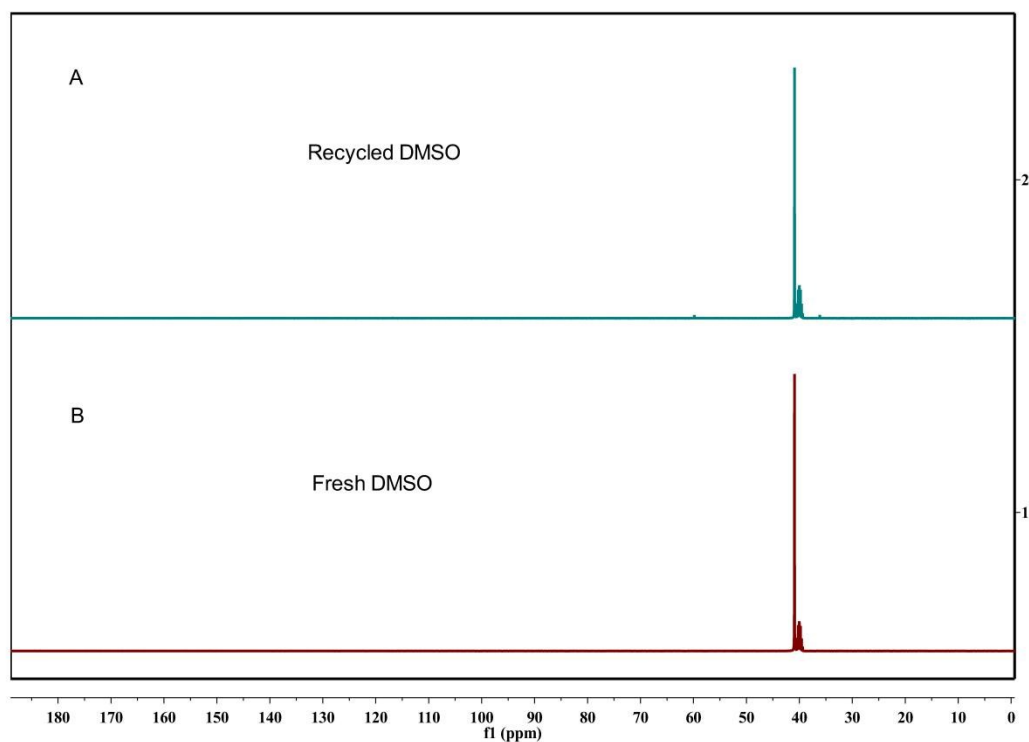

Fig. S6 Comparative  $^{13}\text{C}$  NMR spectra of fresh DMSO and recycled DMSO.

## References

1. T. Yang, P. Xiao, J. Zhang, R. Jia, H. Nawaz, Z. Chen and J. Zhang, *ACS Applied Materials & Interfaces*, 2019, **11**, 4302-4310.
2. H. Yong, X. Wang, R. Bai, Z. Miao, X. Zhang and J. Liu, *Food Hydrocolloids*, 2019, **90**, 216-224.
3. J. Hafsa, M. A. Smach, M. R. B. Khedher, B. Charfeddine, K. Limem, H. Majdoub and S. Rouatbi, *LWT - Food Science and Technology*, 2016, **68**, 356-364.
4. K. Harini and M. Sukumar, *Carbohydrate Polymers*, 2019, **204**, 202-213.
5. S.-L. Chen, D.-J. Yang, H.-Y. Chen and S.-C. Liu, *Food Chemistry*, 2009, **114**, 582-588.

6. K. Crouvisier-Urien, F. Regina da Silva Farias, S. Arunatat, D. Griffin, M. Gerometta, J. R. Rocca-Smith, G. Weber, N. Sok and T. Karbowiak, *Green Chemistry*, 2019, **21**, 4633-4641.
7. K. Mishra, H. Ojha and N. K. J. F. C. Chaudhury, 2012, **130**, p.1036-1043.
